# Supplementary material
Source: PubMed Central journal article supplement (PMC1937529)

| ChemBridge compound ID and comments                                                                            | Chemical Structure                                                                   |
|----------------------------------------------------------------------------------------------------------------|--------------------------------------------------------------------------------------|
| <p>7364519<br/>(molecule 001C07)<br/>FV membrane specific<br/>Mr = 490 ; clogP = 4.48</p>                      | 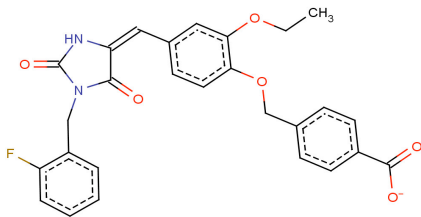   |
| <p>6305867<br/>(molecule 007H10)<br/>Acts on FV and FVIII<br/>membrane binding<br/>Mr = 477 ; clogP = 4.25</p> |    |
| <p>6043266<br/>(molecule 006H08)<br/>FV membrane specific<br/>Mr = 417 ; clogP = 5.65</p>                      |  |
| <p>5843746<br/>(molecule 001D08)<br/>Acts on FV and FVIII<br/>membrane binding<br/>Mr = 438 ; clogP = 6.0</p>  |  |

7688319  
(molecule 005B10)  
Acts on FV and FVIII  
membrane binding  
Mr = 410 ; clogP = 0.95

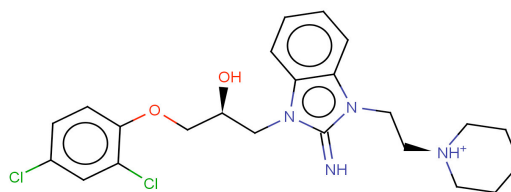

7971347  
(molecule 007D08)  
FV-membrane specific  
Mr = 459 ; clogP = 5.5

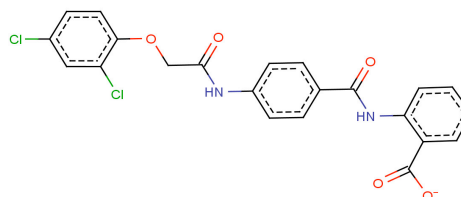

6446853  
(molecule 008A07)  
Acts on FV and FVIII  
membrane binding  
Mr = 496 ; clogP = 6.4

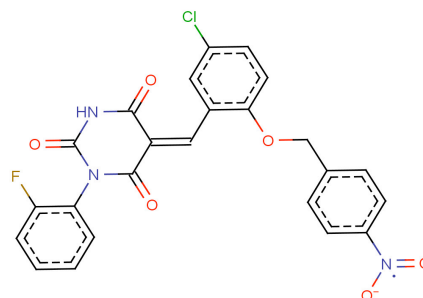

5169083  
(molecule 001B03)  
Inhibition **not due** to  
membrane interference  
Mr = 400 ; clogP = 4.6

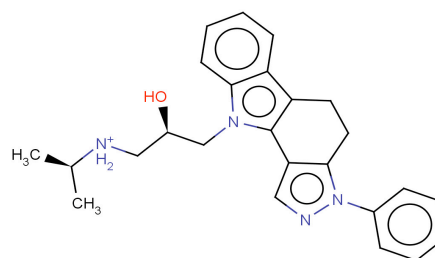

5870804  
(molecule 010G06)  
Inhibition **not due** to  
membrane interference  
Mr = 451 ; clogP = 6.80

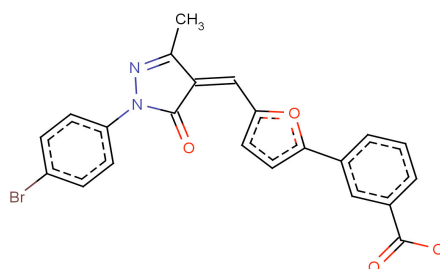

Supplement: pnas_0701051104_1.pdf [file pnas_0701051104_1.pdf]
